# Supplementary material
Source: Springer Nature journal article supplement (https://www.springermedizin.de/resource/supplementary/12943_2010_773_MOESM15_ESM.pdf/9554784)
Supplement: MOESM15 [file 9554784]

Extracellular Space

Plasma Membrane

Cytoplasm

Nucleus

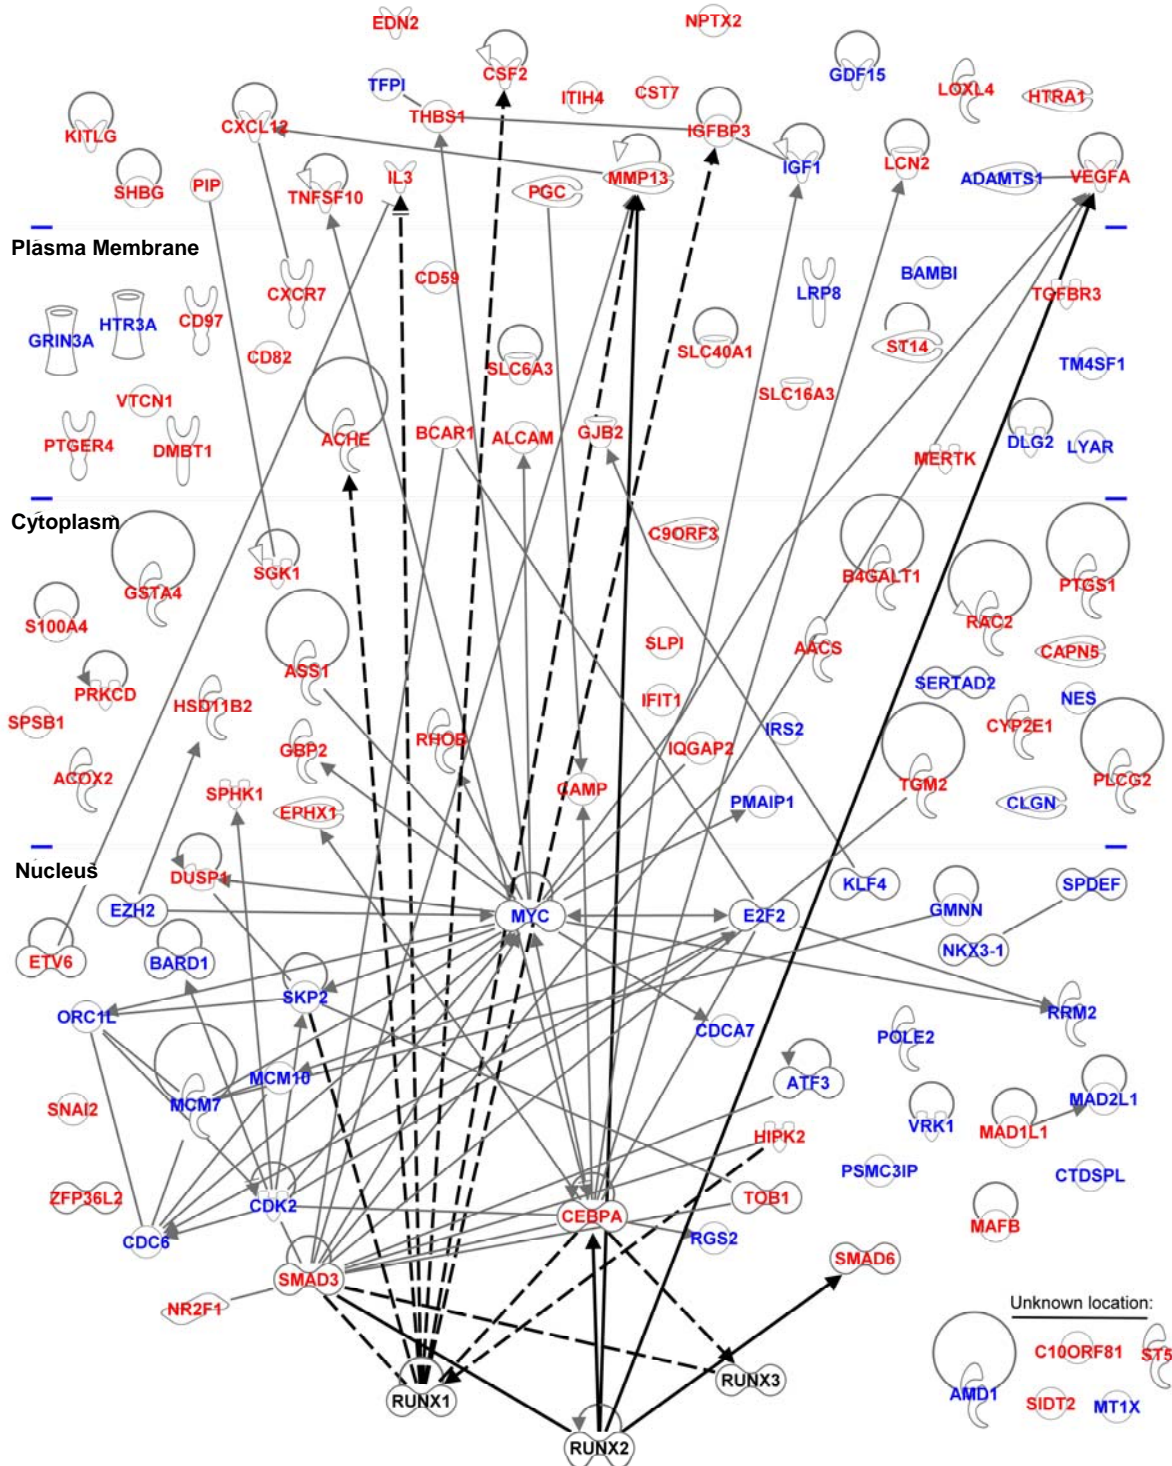

- Cytokine/Growth Factor
- Enzyme
- G-protein Coupled Receptor

- Ion Channel
- Kinase
- Ligand-dependent Nuclear Receptor

- Peptidase
- Phosphatase
- Transcription Regulator

- Transmembrane Receptor
- Transporter
- Unknown
- Relationship
- Relationship
